# Supplementary material for: Arabidopsis Hypocotyl Adventitious Root Formation Is Suppressed by ABA Signaling
Source: MDPI journal article supplement (doi:10.3390/genes12081141), 2021-07-27
Supplement: s1 [file s1]

Supplementary Materials:

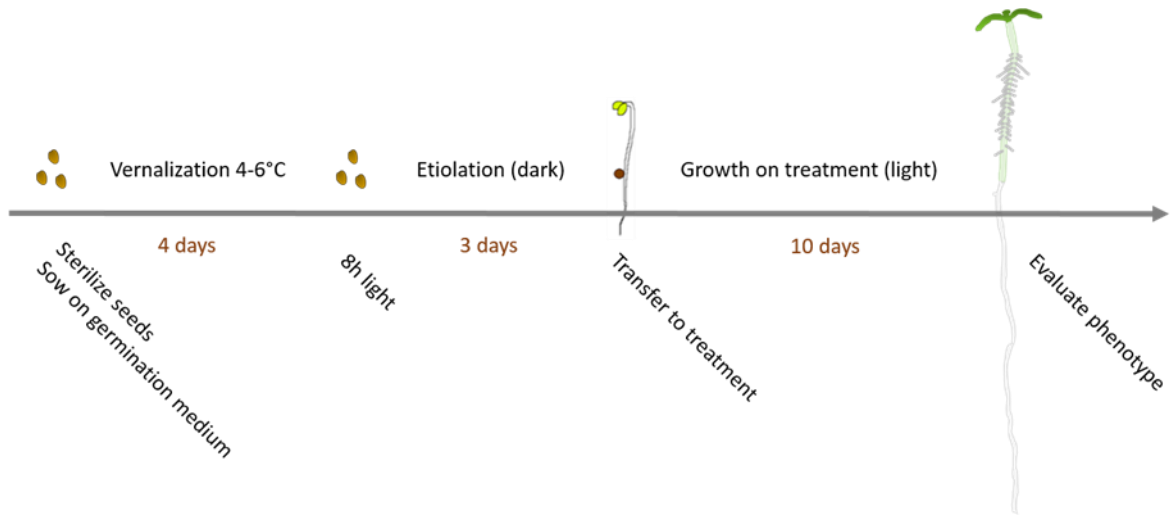

**Figure S1.** Growth and sampling scheme of *Arabidopsis thaliana* seedlings in the adventitious root assay.

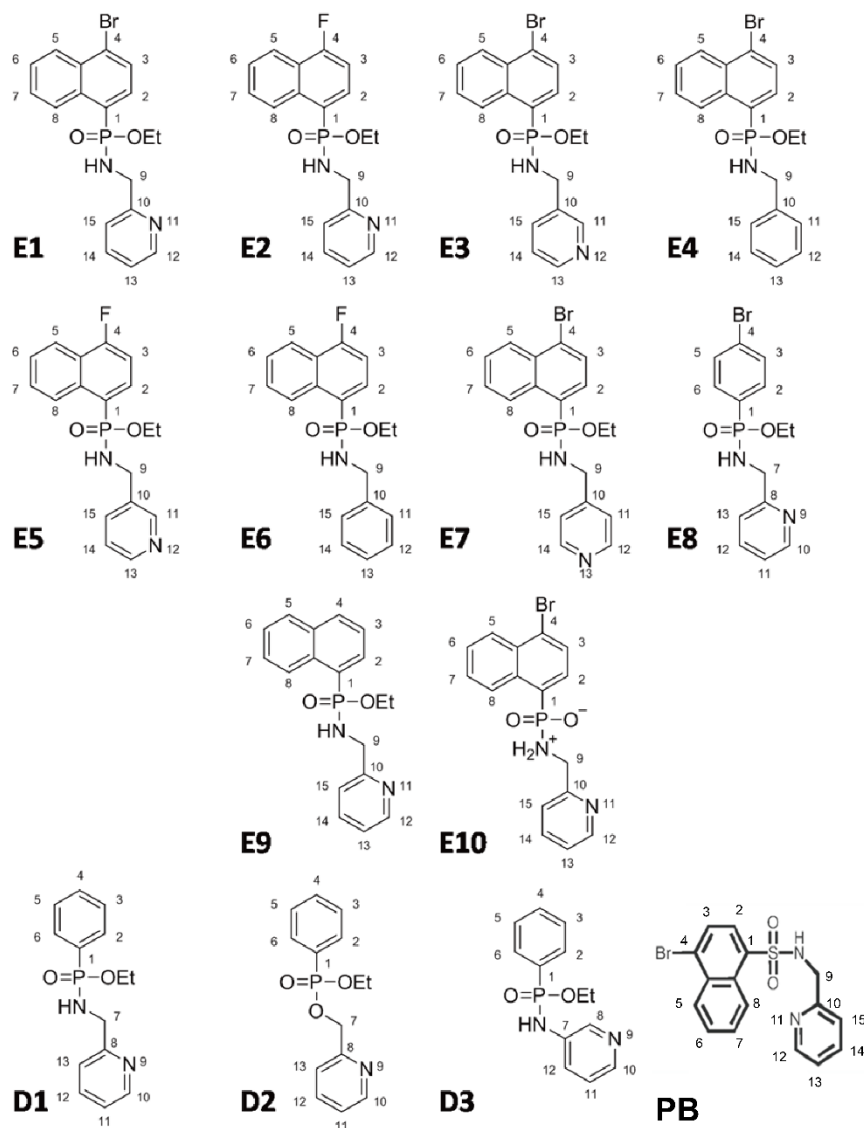

**Figure S2.** Chemical structures of phosphonamide (E1-E10) and phosphonate (D1-D3) pyrabactin analogues. E1, Ethyl N-(pyridin-2-ylmethyl)-P-(4-bromonapht-1-yl)phosphonamidite; E2, Ethyl N-(pyridin-2-ylmethyl)-P-(4-fluoronapht-1-yl)phosphonamidite; E3, Ethyl N-(pyridin-3-ylmethyl)-P-(4-bromonapht-1-yl)phosphonamidite; E4, Ethyl N-(benzyl)-P-(4-bromonapht-1-yl)phosphonamidite; E5, Ethyl N-(pyridin-3-ylmethyl)-P-(4-fluoronapht-1-yl)phosphonamidite; E6, Ethyl N-(benzyl)-P-(4-fluoronapht-1-yl)phosphonamidite; E7, Ethyl N-(pyridin-4-ylmethyl)-P-(4-bromonapht-1-yl)phosphonamidite; E8, Ethyl N-(pyridin-2-ylmethyl)-P-(4-bromophenyl)phosphonamidite; E9, Ethyl N-(pyridin-2-ylmethyl)-P-(napht-1-yl)phosphonamidite; E10, Hydrogen N-(pyridin-2-ylmethyl)-P-(4-bromonapht-1-yl)phosphonamidite; D1, Ethyl N-(pyridin-2-ylmethyl)-P-(phenyl)phosphonamidite; D2, Ethyl (pyridin-2-ylmethyl) phenylphosphonate; D3, Ethyl N-(pyridin-3-yl)-P-(phenyl)phosphonamidite. PB, pyrabactin.

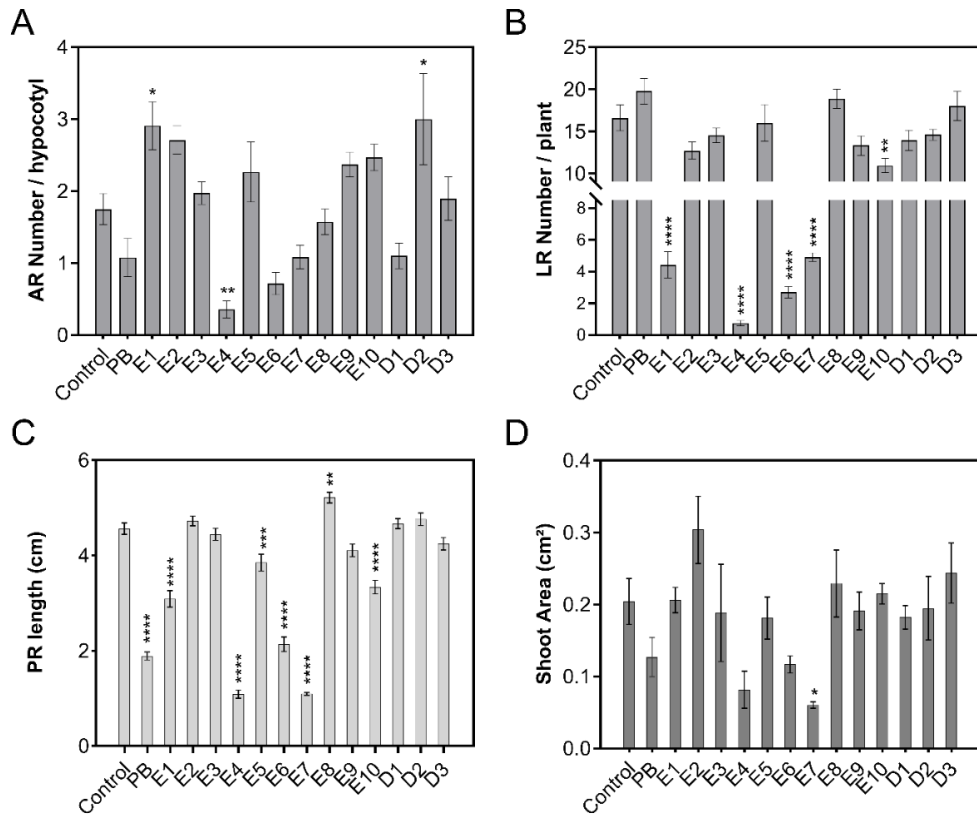

**Figure S3.** Phenotypic characterization of novel PB analogs. Col-0 plants were grown for 10 days after stratification following 3 days of etiolation in the dark. Quantification of the primary root growth (A), lateral root number per plant (B), adventitious root number per hypocotyl (C) and shoot area (D). Plants in the absence or presence of 10  $\mu$ M PB or PB analogues. Data are represented as mean values  $\pm$  se were obtained from plants grown in three independent experiments (n = 20–25). Statistics were calculated through ANOVA and levels of significance are represented as (\*)  $P \leq 0.05$ , (\*\*)  $P \leq 0.01$ , (\*\*\*)  $P \leq 0.001$  and (\*\*\*\*)  $P \leq 0.0001$ .

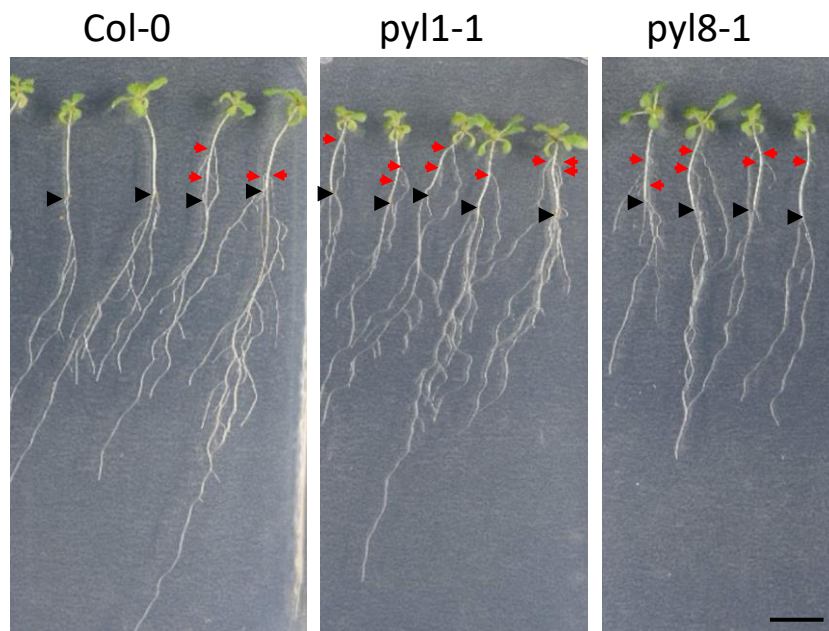

**Figure S4.** Phenotype of *pyl1-1* and *pyl8-1*. Black arrow heads indicate the position of the hypocotyl root junction; red arrows indicate the origins of AR. *Py11-1* and *Py18-1* display a root architecture that is similar to the WT control Col-0, albeit that *pyl1-1* and *pyl8-1* showed a tendency to produce slightly more AR.

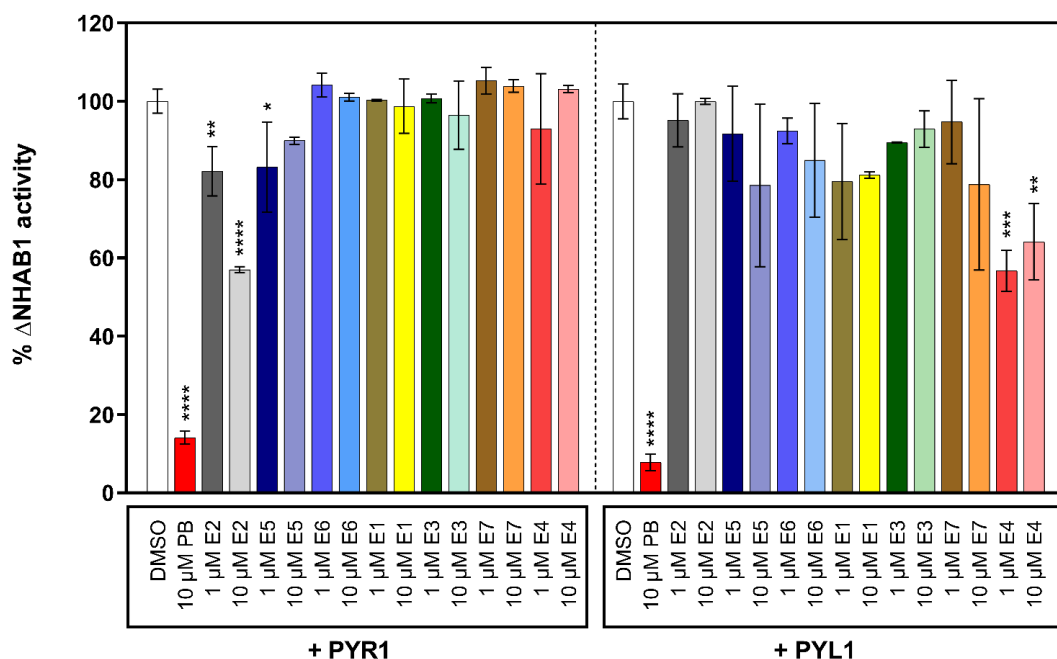

**Figure S5.** Effect of PB and PB analogs on PP2C phosphatase activity. Phosphatase activity was measured using pNPP as a substrate and PP2C  $\Delta$ NHAB1 and either PYR1 or PYL1. PB was applied at 10 $\mu$ M and the PB analogs at 1 or 10 $\mu$ M. E2 inhibited PYR1 and E4 inhibited PYL1-mediated  $\Delta$ NHAB1 phosphatase activity. Data are represented as mean values  $\pm$  sd obtained from three independent experiments. Statistics were calculated through ANOVA and levels of significance are represented as (\*)  $P \leq 0.05$ , (\*\*)  $P \leq 0.01$ , (\*\*\*)  $P \leq 0.001$  and (\*\*\*\*)  $P \leq 0.0001$ .

**Table S1.** List of PCR primers.

| Name     | Locus tag | Primer sequences (5' - 3')  |
|----------|-----------|-----------------------------|
| pyr1-1_F | At4g17870 | TAA AAG CTC GTC GTC GTC TTC |
| pyr1-1_R |           | GGA AAA GAA AAG GAA AAC CTT |
| pyl1-1_F | At5g46790 | TC                          |
| pyl1-1_R |           | ATGGCGAATTCAGAGTCCTCC       |
| pyl2-1_F | At2g26040 | TTACCTAACCTGAGAAGAGTT       |
| pyl2-1_R |           | ACCATGGGCTCATCCCCGGCCGTG    |
| pyl3_F   | At1g73000 | A                           |
| pyl3_R   |           | TTATTCATCATCATGCATAGGTG     |
| pyl4-1_F | At2g38310 | AGG AGC AAT TTG AAC TCC CTC |
| pyl4-1_R |           | TTG GAA ACC TGG ATT GTT GAC |
| pyl5_F   | At5g05440 | ACCATGGTTGCCGTTACCGTCCTT    |
| pyl5_R   |           | TCACAGAGACATCTTCTTCTTGC     |
| pyl8-1_F | At5g53160 | ATGAGGTCACCGGTGCAACT        |
| pyl8-1_R |           | TTATTGCCGGTTGGTACTTCGA      |
| pyl9_F   | At1g01360 | ATGGAAGCTAACGGATTGAG        |
| pyl9_R   |           | TTAGACTCTCGATTCTGTCTG       |
| LBb1.3   |           | TTC ACT TCA ATG CCC TTG TTC |
|          |           | TAG GTC CCC AAA ACG TCA TAC |
|          |           | ATT TTG CCG ATT TCG GAA C   |

**Table S2.** Overview of bioactivity scoring of phosphonamide and phosphonate pyrabactin analogs. All the molecules were applied at 10  $\mu$ M after etiolation and scoring was done after transfer to light for 10 days. The impact of the compounds was compared with control not-treated seeds and seedlings and scored as not different from control (0), strong action (+++), intermediate action (++), weak action (+) and opposite action (-).

| Analogue | Seed germination | PR growth | LR initiation | AR initiation | Shoot development |
|----------|------------------|-----------|---------------|---------------|-------------------|
| ABA      | +++              | +++       | +++           | ++            | +++               |
| PB       | ++               | ++        | ++            | +             | ++                |
| E1       | 0                | +         | ++            | -             | 0                 |
| E2       | 0                | 0         | +             | -             | -                 |
| E3       | 0                | 0         | +             | -             | 0                 |
| E4       | +                | +++       | +++           | +++           | +++               |
| E5       | +++              | +         | +             | 0             | 0                 |
| E6       | 0                | ++        | +++           | ++            | ++                |
| E7       | 0                | +++       | +++           | +             | +++               |
| E8       | 0                | 0         | +/-           | 0             | 0                 |
| E9       | 0                | 0         | +             | -             | 0                 |
| E10      | 0                | +         | +             | -             | 0                 |
| D1       | +                | 0         | +/-           | 0             | 0                 |
| D2       | 0                | 0         | 0             | -             | 0                 |
| D3       | 0                | 0         | 0             | 0             | 0                 |
